# Supplementary material for: Site fidelity, size, and morphology may differ by tidal position for an intertidal fish,Bathygobius cocosensis(Perciformes-Gobiidae), in Eastern Australia
Source: PeerJ journal article supplement (doi:10.7717/peerj.2263), 2016-07-28
Supplement: SuppFig1_Malard.pdf [file SuppFig1_Malard.pdf]

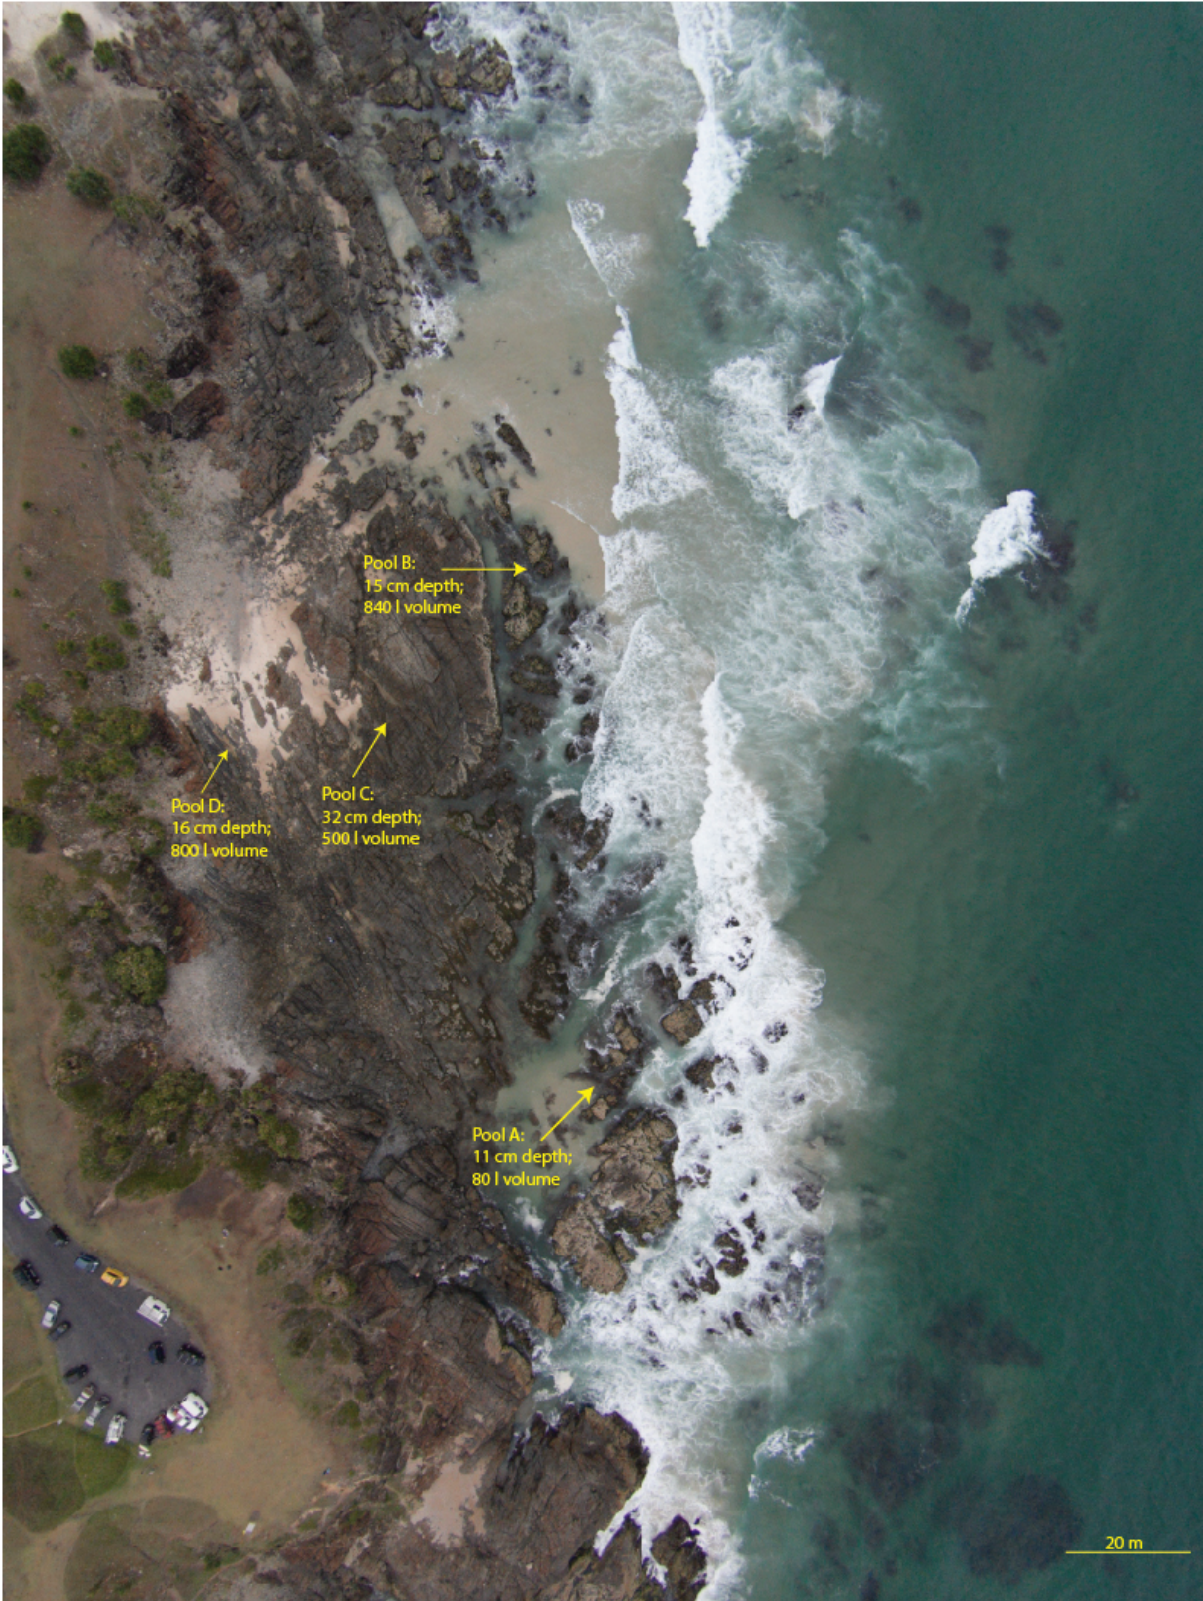

Supplemental Figure 1: Aerial view of the tidal platform and sampling pools at Hastings Point, NSW.
