# Supplementary material for: Site fidelity, size, and morphology may differ by tidal position for an intertidal fish,Bathygobius cocosensis(Perciformes-Gobiidae), in Eastern Australia
Source: PeerJ journal article supplement (doi:10.7717/peerj.2263), 2016-07-28
Supplement: SuppFig2_Malard.pdf [file SuppFig2_Malard.pdf]

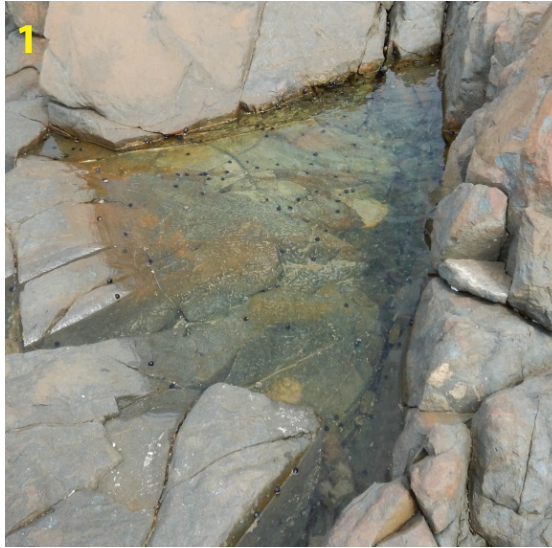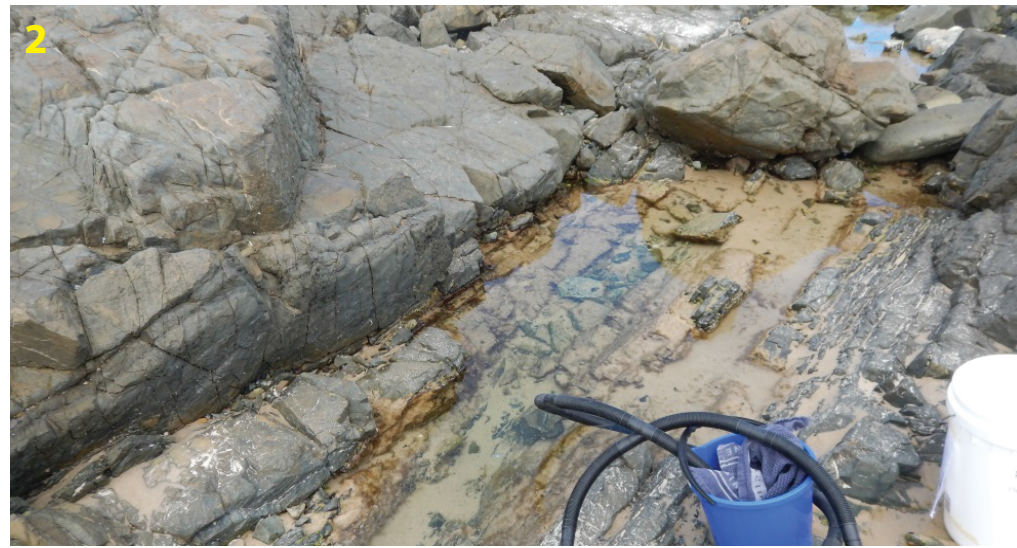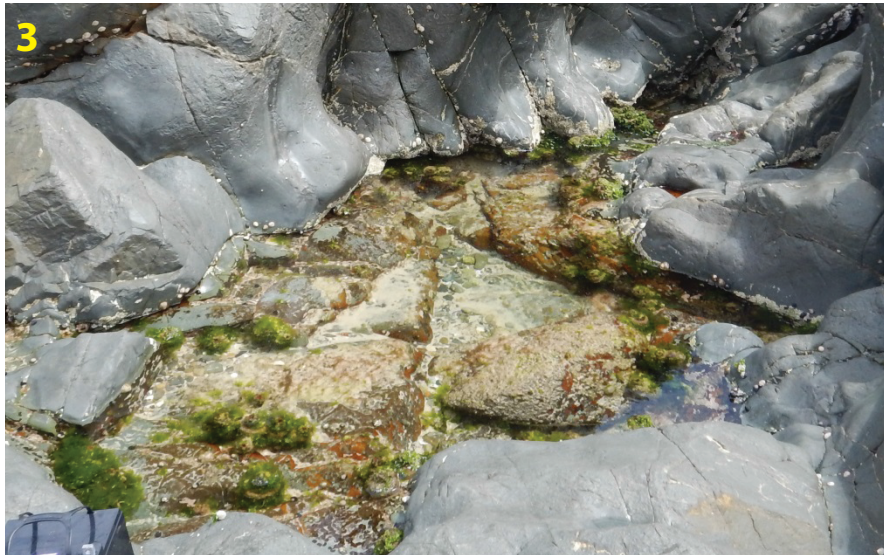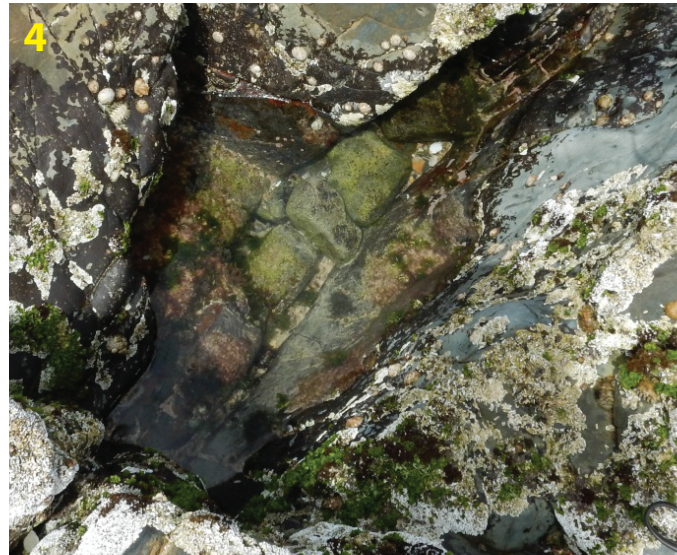

Supplemental Figure 2: Typical high (1 & 2) and low (3 & 4) pools. Photo #2 is that of sampled pool B.
