# Supplementary material for: Site fidelity, size, and morphology may differ by tidal position for an intertidal fish,Bathygobius cocosensis(Perciformes-Gobiidae), in Eastern Australia
Source: PeerJ journal article supplement (doi:10.7717/peerj.2263), 2016-07-28
Supplement: Supplemental_Tables_1_&_2.pdf [file Supplemental_Tables_1_%26_2.pdf]

1 SUPPLEMENTARY MATERIALS

2

3 **Table 1.** Support for specific models of survival and site fidelity from MARK. MARK  
 4 models are ordered by AIC<sub>c</sub> values. The best two models indicate that encounter probability  
 5 differs by habitat grouping ( $p(g)$ ).

| Model <sup>a</sup>      | AIC <sub>c</sub> <sup>b</sup> | ΔAIC <sub>c</sub> <sup>b</sup> | w <sub>i</sub> <sup>b</sup> |
|-------------------------|-------------------------------|--------------------------------|-----------------------------|
| $\Phi (\cdot) p(g)$     | 299.744                       | 0.00                           | 0.53797                     |
| $\Phi (g) p(g)$         | 300.393                       | 0.65                           | 0.38883                     |
| $\Phi (t) p(g)$         | 304.885                       | 5.14                           | 0.04115                     |
| $\Phi (\cdot) p(\cdot)$ | 307.904                       | 8.16                           | 0.00910                     |
| $\Phi (g) p(\cdot)$     | 308.082                       | 8.34                           | 0.00832                     |
| $\Phi (\cdot) p(g^*t)$  | 308.944                       | 9.20                           | 0.00541                     |
| $\Phi (g) p(g^*t)$      | 309.656                       | 9.91                           | 0.00379                     |
| $\Phi (g^*t) p(g)$      | 311.440                       | 11.70                          | 0.00155                     |
| $\Phi (g) p(t)$         | 312.183                       | 12.44                          | 0.00107                     |
| $\Phi (\cdot) p(t)$     | 312.501                       | 12.76                          | 0.00091                     |
| $\Phi (t) p(\cdot)$     | 313.327                       | 13.58                          | 0.00060                     |
| $\Phi (t) p(g^*t)$      | 313.529                       | 13.79                          | 0.00055                     |
| $\Phi (t) p(t)$         | 314.347                       | 14.60                          | 0.00036                     |
| $\Phi (g^*t) p(\cdot)$  | 314.775                       | 15.03                          | 0.00029                     |
| $\Phi (g^*t) p(t)$      | 317.959                       | 18.22                          | 0.00006                     |
| $\Phi (g^*t) p(g^*t)$   | 318.993                       | 19.25                          | 0.00004                     |

6 <sup>a</sup>  $\Phi$  is the survival probability and p is the encounter probability; full stops (·) indicate a  
 7 single value for both habitats; (g) indicates that value differ by habitat group; (t) indicates that  
 8 values differ by time; and asterisks ( $g^*t$ ) indicate an interaction term between group and time.

9 <sup>b</sup> The lowest AIC<sub>c</sub> indicates the model fitting mark-recapture data best; ΔAIC<sub>c</sub> is the AIC<sub>c</sub>  
 10 difference between the best and individual model; w<sub>i</sub> is the support weight for each model.

11

**Table 2.** Details of model averaging for to yield rockpool specific estimates of survival ( $\Phi$ ) and encounter probability ( $p$ ). Variable specific MARK estimates for the best two models are reported and a weighted average of models was conducted as recommended in the MARK guidelines (Cooch and White 2006).

| Rockpool ID | Model            | weight | $\Phi$   |       | $p$      |       |
|-------------|------------------|--------|----------|-------|----------|-------|
|             |                  |        | estimate | SE    | estimate | SE    |
| A           | $\Phi(.) p(g)$   | 0.580  | 0.596    | 0.048 | 0.172    | 0.099 |
|             | $\Phi(g) p(g)$   | 0.420  | 0.936    | 0.335 | 0.076    | 0.078 |
|             | Weighted Average |        | 0.739    | 0.168 | 0.131    | 0.090 |
| B           | $\Phi(.) p(g)$   | 0.580  | 0.596    | 0.048 | 0.441    | 0.133 |
|             | $\Phi(g) p(g)$   | 0.420  | 0.766    | 0.138 | 0.309    | 0.142 |
|             | Weighted Average |        | 0.667    | 0.086 | 0.386    | 0.137 |
| C           | $\Phi(.) p(g)$   | 0.580  | 0.596    | 0.048 | 0.801    | 0.095 |
|             | $\Phi(g) p(g)$   | 0.420  | 0.607    | 0.063 | 0.796    | 0.100 |
|             | Weighted Average |        | 0.601    | 0.054 | 0.799    | 0.097 |
| D           | $\Phi(.) p(g)$   | 0.580  | 0.596    | 0.048 | 0.468    | 0.115 |
|             | $\Phi(g) p(g)$   | 0.420  | 0.457    | 0.078 | 0.648    | 0.154 |
|             | Weighted Average |        | 0.538    | 0.060 | 0.543    | 0.131 |
